# Supplementary material for: Quantifying digital health inequality across a national healthcare system
Source: PubMed Central journal article supplement — BMJ Health Care Inform. 2023 Nov 24;30(1):e100809. doi: 10.1136/bmjhci-2023-100809 (PMC10680008; doi:10.1136/bmjhci-2023-100809), 2023-11-24
Supplement: bmjhci-2023-100809supp001.pdf [file bmjhci-2023-100809supp001.pdf]

# Quantifying digital health inequality across a national healthcare system

## SUPPLEMENTARY MATERIALS

Joe Zhang<sup>1,2,\*</sup>, Jack Gallifant<sup>3</sup>, Robin L Pierce<sup>4</sup>, Aoife Fordham<sup>5</sup>, James T Teo<sup>6,7</sup>, Leo A Celi<sup>8,9,10</sup>, Hutan Ashrafian<sup>1</sup>

\*Corresponding author: [jzhang@nhs.net](mailto:jzhang@nhs.net) / [joe.zhang@imperial.ac.uk](mailto:joe.zhang@imperial.ac.uk)

1. Institute of Global Health Innovation, Imperial College London, London, UK
2. Department of Critical Care, Guy's and St. Thomas' Hospital, London, UK
3. Department of Critical Care, Imperial College Healthcare NHS Trust, London, UK
4. University of Exeter Law School, University of Exeter, Exeter, UK
5. Transformation Directorate, NHS England, UK
6. Department of Neurology, King's College Hospital NHS Foundation Trust, London, UK
7. London Medical Imaging & AI Centre, Guy's and St. Thomas' Hospital, London, UK
8. Institute for Medical Engineering and Science, Massachusetts Institute of Technology, Cambridge, USA
9. Division of Pulmonary, Critical Care and Sleep Medicine, Beth Israel Deaconess Medical Center, Boston, USA
10. Department of Biostatistics, Harvard T.H. Chan School of Public Health, Boston, USA

## Results

Full results are reported in **Tables & Figures** below. Table A shows results for multivariable and univariate analyses across both interventions. Table B summarises the primary care provider population.

## Methods

### *Study setting and data sources*

We performed a retrospective observational study across populations of primary care practices in NHS England, providing general health services to 55 million patients. Data were obtained from NHS Digital and NHS Improvement who host administrative datasets and systems metadata. Small area ethnicity and deprivation data were from the Office of National Statistics. Our study took place from November 2021 to October 2022 inclusive, a period reflecting relative stability in COVID-19 activity[1]. At the start of the study period, the observed digital health interventions were nationally available.

### *Inclusion, exclusion, and missing data*

An inclusion flow chart is shown in *Figure A*. We included all active primary care centres in England. This designation includes general practices, but also other specialist services that are cost centres for prescribing. We therefore excluded registered companies for remote, app-based services, and specialist clinics for drug, alcohol, and homeless support. We excluded practices that closed during the study period. A small number of practices did not submit administrative data in the study period (0.7%) or exhibited missing outcomes metadata (<0.5%) and were excluded.

### *Outcome variables*

Outcome variables were: (1) percentage of practice population who had activated the NHS App by October 2022; (2) percentage of practice population who had activated online services by October 2022. These actions reflect active engagement on the part of patients and are therefore taken as indicators for digital health uptake.

### *Deprivation and ethnicity*

We used geographic Indices of Multiple Deprivation (IMD), a standardised, aggregate index of income, employment, education, health, crime, housing, and local environment[2]. Patients are assigned to IMD quintiles based on their residence (with the first quintile representing patients from the 20% most deprived areas). We took per-practice percentage of patients from each IMD quintile.

Gold standard ethnicity data consists of small area data from the 2021 national census. We assumed that proportion of ethnicities in small area subpopulations remains consistent across registrations from each small area to each primary care practice. We took per-practice percentage of Black, Asian, and White patients as covariates.

### *Other covariates*

Per-practice covariates included the following: percentage of patients within age categories, percentage of patients on chronic disease registers, average number of unique prescription items administered per patient, full time equivalent general practitioners and non-clinical staff per patient, and percentage of patients from nationally defined urban or rural residence. We used a dummy variable to represent university-based practices where all registered patients were students. For analysis of online services usage, we also included the software supplier as a covariate. Full descriptions are found in *Table C*.

### *Statistical analyses*

Univariate and multivariable linear regression models were constructed. Covariates were removed from analysis if Variance Inflation Factors exceeded 6, indicating troublesome multicollinearity. Linearity, homoscedasticity, and normality of residuals were assessed visually (*Figure B*). Coefficients for the lowest two deprivation quintiles were used to estimate an associated population effect for each practice.

### *Patient and Public involvement*

While no patients were directly involved in this study, our research relates to the national CORE20PLUS5 programme focusing on patient inequalities related to the first IMD quintile[3].

## Limitations

We note several limitations. Results reflect population activity and do not directly inform inference for individual patients, or their propensity to adopt digital technology. We are unable to individually adjust or generate inference for unmeasured patient-level factors such as digital literacy, or device availability, or other social determinants of digital access. This is a trade-off of a population-level analysis. Additionally, we are only able to measure activation of digital services, due to data quality issues for “click-through” metadata. Ethnicity co-variables are derived from the 2021 census, as practice/patient-level ethnicity are unavailable for analysis (see Methods). Finally, our analysis does not directly account for per-practice initiatives to promote digital health uptake in registered populations.

## Ethics

As an observational analysis of non-personal metadata and aggregate population datasets, this study did not qualify as research as research under Health Research Authority definitions. Data was taken from centralised NHS data collections, and, as such, is deemed representative of the UK population. Population analysis of metadata generally does not raise questions of privacy or informed consent. However, given the topic of this study, it is important to scrutinize the methods to examine whether and how structural factors may have impacted various aspects of the data set and findings. We found no cause for concern in this regard in this study.

## Data & Code Availability

Links to all analysed datasets are found in *Table C*. Analysis performed using the *statsmodels* package in Python 3.8. Geo-visualisations created using ArcGIS 3.0.2.

## References

- 1 Office of National Statistics. Coronavirus (COVID-19) latest insights dashboard. 2022. <https://www.ons.gov.uk/peoplepopulationandcommunity/healthandsocialcare/conditionsanddiseases/articles/coronaviruscovid19latestinsights/overview>
- 2 Ministry of Housing, Communities, & Local Government. English Indices of Deprivation 2019: technical report. 2019.
- 3 NHS Improvement. Core20Plus5: An approach to reducing health inequalities. 2021. <https://www.england.nhs.uk/about/equality/equality-hub/national-healthcare-inequalities-improvement-programme/core20plus5/>

## Tables & Figures

|                            | Univariate   |             |                 |                 | Multivariable |             |                 |                 |            |
|----------------------------|--------------|-------------|-----------------|-----------------|---------------|-------------|-----------------|-----------------|------------|
| NHS App                    | coeff        | pval        | ci_lower        | ci_upper        | coeff         | pval        | ci_lower        | ci_upper        | VIF        |
| const                      |              |             |                 |                 | 0.504         | 0.000       | 0.484           | 0.524           |            |
| IMD Q1                     | -0.248       | 0.000       | -0.255          | -0.242          | -0.223        | 0.000       | -0.232          | -0.213          | 3.029      |
| IMD Q2                     | -0.181       | 0.000       | -0.194          | -0.168          | -0.117        | 0.000       | -0.128          | -0.106          | 1.846      |
| IMD Q5                     | 0.281        | 0.000       | 0.273           | 0.290           | 0.121         | 0.000       | 0.111           | 0.131           | 2.315      |
| Age 16 to 25               | 0.004        | 0.872       | -0.046          | 0.054           | 0.293         | 0.000       | 0.254           | 0.331           | 1.673      |
| Age 26 to 35               | -0.310       | 0.000       | -0.359          | -0.261          | 0.241         | 0.000       | 0.191           | 0.291           | 2.882      |
| Age 56 to 65               | 0.685        | 0.000       | 0.606           | 0.764           | 0.585         | 0.000       | 0.485           | 0.685           | 4.355      |
| Age 76 to 85               | 1.027        | 0.000       | 0.937           | 1.117           | -0.177        | 0.011       | -0.312          | -0.041          | 5.939      |
| Admin staff per 1000pt     | -0.010       | 0.001       | -0.017          | -0.004          | 0.010         | 0.000       | 0.005           | 0.014           | 1.334      |
| GPs per 1000pt             | 0.039        | 0.000       | 0.030           | 0.048           | 0.025         | 0.000       | 0.019           | 0.030           | 1.105      |
| Black ethnicity            | -0.312       | 0.000       | -0.355          | -0.269          | 0.016         | 0.388       | -0.021          | 0.054           | 2.077      |
| Asian ethnicity            | -0.172       | 0.000       | -0.193          | -0.150          | 0.016         | 0.095       | -0.003          | 0.034           | 2.014      |
| Urban residence            | -0.048       | 0.000       | -0.056          | -0.041          | 0.043         | 0.000       | 0.037           | 0.049           | 1.754      |
| Student practice           | 0.242        | 0.000       | 0.178           | 0.305           | 0.105         | 0.000       | 0.063           | 0.147           | 1.231      |
| COPD                       | -3.044       | 0.000       | -3.273          | -2.815          | 0.535         | 0.000       | 0.289           | 0.782           | 2.959      |
| Heart failure              | 0.015        | 0.904       | -0.226          | 0.255           | 0.394         | 0.000       | 0.199           | 0.589           | 1.862      |
| Dementia                   | 2.167        | 0.000       | 1.550           | 2.785           | -0.751        | 0.002       | -1.233          | -0.269          | 1.717      |
| Mental health disorder     | -1.890       | 0.000       | -2.000          | -1.780          | -0.123        | 0.008       | -0.214          | -0.032          | 1.643      |
| Any long-term condition    | -0.157       | 0.000       | -0.172          | -0.142          | -0.091        | 0.000       | -0.110          | -0.071          | 4.599      |
| Prescription items per pt  | -0.037       | 0.000       | -0.042          | -0.033          | 0.009         | 0.000       | 0.004           | 0.014           | 3.475      |
| <b>Primary Care Online</b> | <b>coeff</b> | <b>pval</b> | <b>ci_lower</b> | <b>ci_upper</b> | <b>coeff</b>  | <b>pval</b> | <b>ci_lower</b> | <b>ci_upper</b> | <b>VIF</b> |
| const                      |              |             |                 |                 | 3.799         | 0.000       | 3.381           | 4.217           |            |
| IMD Q1                     | -2.338       | 0.000       | -2.459          | -2.216          | -2.047        | 0.000       | -2.247          | -1.847          | 3.034      |
| IMD Q2                     | -1.625       | 0.000       | -1.823          | -1.427          | -1.114        | 0.000       | -1.348          | -0.880          | 1.846      |
| IMD Q5                     | 2.567        | 0.000       | 2.416           | 2.719           | 1.269         | 0.000       | 1.055           | 1.482           | 2.321      |
| Age 16 to 25               | -1.842       | 0.000       | -2.585          | -1.098          | 0.184         | 0.661       | -0.638          | 1.005           | 1.674      |
| Age 26 to 35               | -2.225       | 0.000       | -2.954          | -1.496          | 5.819         | 0.000       | 4.762           | 6.876           | 2.882      |
| Age 56 to 65               | 8.491        | 0.000       | 7.317           | 9.666           | 8.872         | 0.000       | 6.752           | 10.992          | 4.351      |
| Age 76 to 85               | 10.832       | 0.000       | 9.476           | 12.189          | -0.889        | 0.540       | -3.731          | 1.952           | 4.816      |
| Admin staff per 1000pt     | -0.141       | 0.000       | -0.213          | -0.070          | -0.059        | 0.157       | -0.141          | 0.023           | 1.796      |
| GPs per 1000pt             | 0.537        | 0.000       | 0.405           | 0.670           | 0.360         | 0.000       | 0.241           | 0.479           | 1.098      |
| Black ethnicity            | -3.017       | 0.000       | -3.657          | -2.377          | 0.034         | 0.934       | -0.765          | 0.833           | 2.116      |
| Asian ethnicity            | -1.469       | 0.000       | -1.792          | -1.145          | 0.973         | 0.000       | 0.579           | 1.367           | 2.013      |
| Urban residence            | -0.538       | 0.000       | -0.647          | -0.430          | 0.298         | 0.000       | 0.174           | 0.421           | 1.752      |
| Student practice           | 2.555        | 0.000       | 1.611           | 3.499           | 2.882         | 0.000       | 1.988           | 3.776           | 1.231      |
| COPD                       | -23.802      | 0.000       | -27.334         | -20.270         | 7.377         | 0.006       | 2.131           | 12.624          | 2.957      |
| Heart failure              | 7.513        | 0.000       | 3.961           | 11.065          | 10.801        | 0.000       | 6.670           | 14.933          | 1.858      |
| Dementia                   | 6.165        | 0.028       | 0.680           | 11.649          | -1.488        | 0.676       | -8.469          | 5.492           | 2.229      |
| Mental health disorder     | -14.125      | 0.000       | -15.766         | -12.485         | 1.387         | 0.161       | -0.554          | 3.328           | 1.844      |
| Any long-term condition    | -1.111       | 0.000       | -1.333          | -0.888          | -1.161        | 0.000       | -1.580          | -0.742          | 4.823      |
| Prescription items per pt  | -0.237       | 0.000       | -0.303          | -0.171          | 0.173         | 0.002       | 0.065           | 0.281           | 3.648      |
| EMIS vendor                | -0.209       | 0.000       | -0.282          | -0.136          | -0.188        | 0.000       | -0.252          | -0.124          | 1.064      |

**Table A** – results of univariate and multivariable linear regression analyses for association of primary care practice population characteristics with digital intervention uptake. IMD Q1 = index of multiple deprivation, quintile 1; pt = patient; GP = general practitioner; COPD = chronic obstructive pulmonary disease; EMIS = EMIS Health, Leeds, UK. Covariates excluded due to multicollinearity include: age brackets 36 to 45, 46 to 55, 66 to 75, over 85; IMD brackets Q3 and Q4; white ethnicity; ischaemic heart disease, diabetes, and hypertension. Full description of covariates in *Appendix Table B*.

| Primary care provider (n=6356) covariates | Summary statistics     |
|-------------------------------------------|------------------------|
| Practice list size                        | 8308 [5427-12019]      |
| IMD Q1 % population                       | 11.8 [0.6-39.3]        |
| IMD Q2 % population                       | 17.7 [7.4-30.5]        |
| IMD Q3 % population                       | 16.7 [8.1-27.7]        |
| IMD Q4 % population                       | 15.6 [5.2-27.8]        |
| IMD Q5 % population                       | 6.9 [0.8-26.9]         |
| Age 16 to 25 % population                 | 10.6 [9.6-11.9]        |
| Age 26 to 35 % population                 | 13.7 [11.5-16.1]       |
| Age 36 to 45 % population                 | 13.5 [11.9-15.7]       |
| Age 46 to 55 % population                 | 13.4 [12.6-14.2]       |
| Age 56 to 65 % population                 | 12.7 [10.7-14.3]       |
| Age 76 to 85 % population                 | 9.4 [6.8-11.7]         |
| Age 86+ % population                      | 5.5 [3.7-7.3]          |
| Admin staff per 1000pt                    | 1.9 [1.2-2.5]          |
| GPs per 1000pt                            | 1.2 [0.9-1.4]          |
| Black ethnicity % population              | 0.5 [0.4-0.7]          |
| Asian ethnicity % population              | 2.3 [0.7-7.3]          |
| White ethnicity % population              | 6 [2.1-15]             |
| Percentage in Urban residence             | 85.6 [67.8-94.7]       |
| University-based practices                | 9 (0.14%)              |
| Percentage with COPD                      | 1.9 [1.3-2.6]          |
| Percentage with heart failure             | 1.5 [1-2.2]            |
| Percentage with dementia                  | 0.6 [0.4-0.8]          |
| Percentage with IHD                       | 5.9 [4.5-7.3]          |
| Percentage with mental health disorder    | 4 [3-5.4]              |
| Percentage with hypertension              | 13.7 [11.3-15.9]       |
| Prescription items per patient            | 156.9 [121.6-193.6]    |
| Medicines cost per patient                | 1247.1 [1018.8-1446.2] |
| Providers using EMIS EHR                  | 3815 (60%)             |
| Providers using TPP EHR                   | 2492 (39.2%)           |
| Providers using Vision EHR                | 21 (0.33%)             |
| Percentage online services activation     | 54.9 [45.3-63.3]       |
| Percentage NHS App activation             | 60.6 [53.9-67.3]       |

**Table B** – Summary characteristics of primary care provider analysis population. Continuous variables represented with median and interquartile range (median [IQR]). Categorical variables represented with count and percentage of total population (n (%)). “List size” refers the official registered list of patients per provider. IMD = Index of Multiple Deprivation; GP = General Practitioner; COPD = Chronic Obstructive Pulmonary Disease; IHD = Ischaemic Heart Disease; EMIS = Egton Medical Information Systems; TPP = The Phoenix Partnership; EHR = Electronic Health Record; NHS = National Health Service

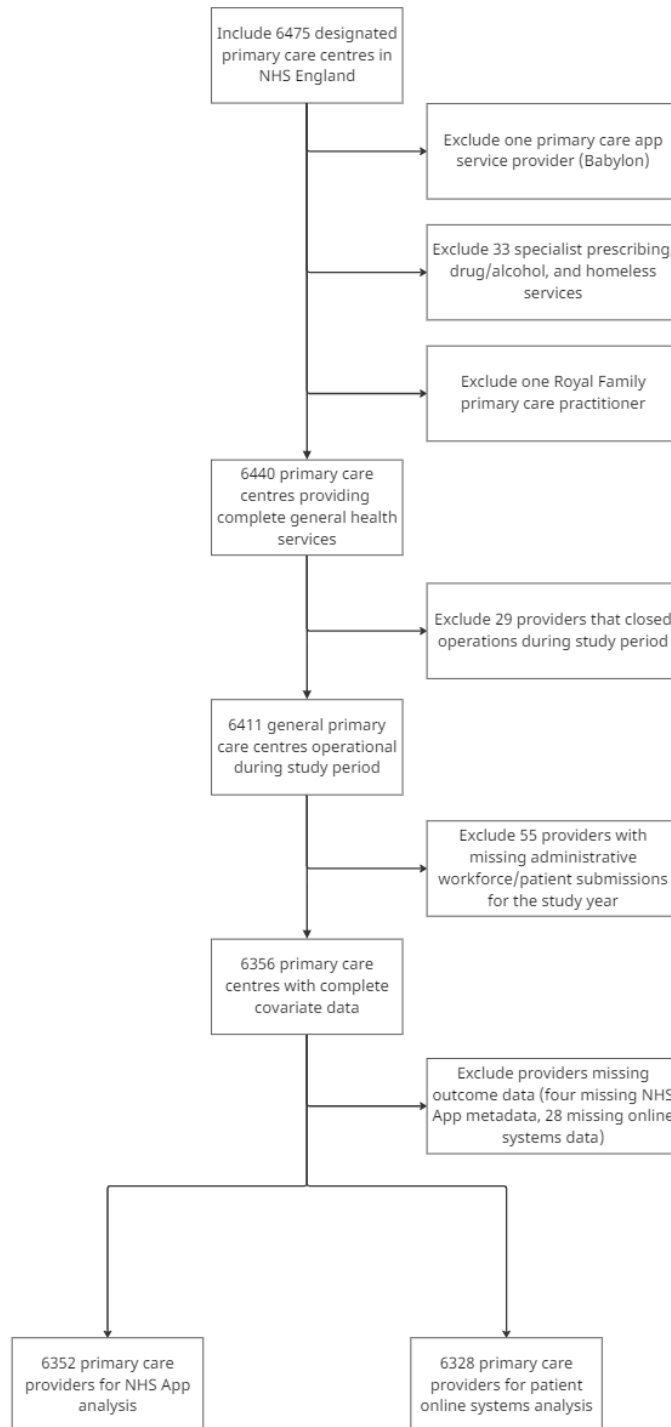

**Figure A** – Population inclusion flow chart



| VARIABLES                                          | DATA SOURCE                                                                                                                                                                                                             |
|----------------------------------------------------|-------------------------------------------------------------------------------------------------------------------------------------------------------------------------------------------------------------------------|
| <b>Covariates</b>                                  |                                                                                                                                                                                                                         |
| Primary care providers and list size               | Quarterly and historical publications for active primary care practices as prescribing cost centres from NHS Digital, and the NHS Digital Organisation Data Service [ <a href="#">Data 1</a> / <a href="#">Data 2</a> ] |
| Primary care provider list sizes                   | Monthly and historical list sizes for primary care practices from NHS England information services [ <a href="#">Data files</a> ]                                                                                       |
| Deprivation of registered population               | NHS Digital “patients registered at a GP practice”, by deprivation [ <a href="#">Data files</a> ]                                                                                                                       |
| Primary care practice population age               | NHS Digital “patients registered at a GP practice”, by age in years [ <a href="#">Data files</a> ]                                                                                                                      |
| Primary care staffing data                         | NHS Digital general practice workforce datasets [ <a href="#">Data files</a> ]                                                                                                                                          |
| Gold-standard small area geographic ethnicity data | Results of 2021 national census, small area ethnicity dataset [ <a href="#">Data files</a> ]                                                                                                                            |
| Population chronic disease prevalence              | Chronic disease lists for Quality and Outcomes Framework prevalence and exceptions [ <a href="#">Data files</a> ]                                                                                                       |
| Practice-level prescribing summary data            | Extract of practice level data for study period from the OpenSAFELY OpenPrescribing portal [ <a href="#">Openprescribing</a> ].                                                                                         |
| <b>Outcomes</b>                                    |                                                                                                                                                                                                                         |
| NHS App activations                                | Practice-level metadata for NHS App activations and usage. Data accessible through application to NHS England. [ <a href="#">Data files</a> ]                                                                           |
| Patient online services activations                | NHS Digital Patient Online Management Information systems metadata [ <a href="#">Data files</a> ]                                                                                                                       |

**Table C** – Description of covariate datasets with links to data files. Data is owned by respective publishing organisations. NHS App metadata accessible through application to NHS England via any NHS organisation.

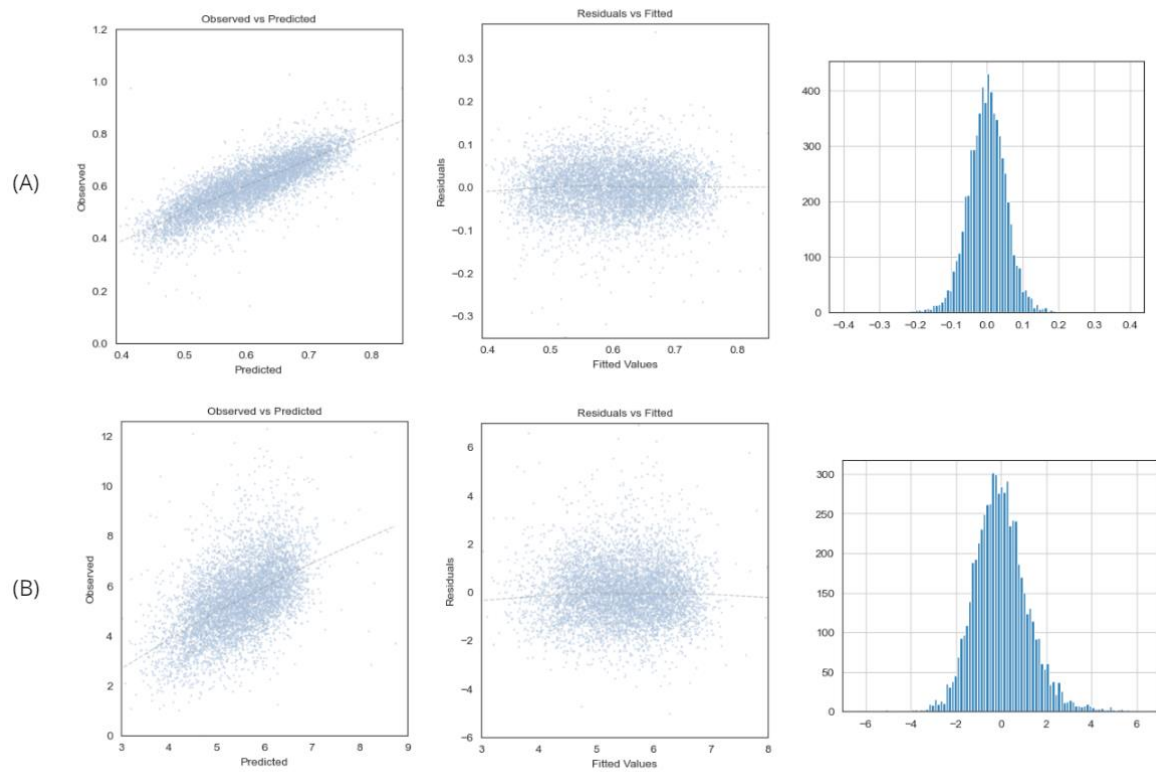

**Figure B** – Assessment of linearity, homoscedasticity, and normality for multivariable models: NHS App activation (A), and primary care online services (B)
